# Supplementary material
Source: ML conference proceedings conference paper supplement (https://aclanthology.org/D19-1048)
Supplement: Attachment [file D19-1048.Attachment.pdf]

# Supplementary Material: Latent-Variable Generative Models for Data-Efficient Text Classification

Xiaoan Ding<sup>1</sup> Kevin Gimpel<sup>2</sup>

<sup>1</sup>University of Chicago, Chicago, IL, 60637, USA

<sup>2</sup>Toyota Technological Institute at Chicago, Chicago, IL, 60637, USA

xiaoanding@uchicago.edu, kgimpel@ttic.edu

## A Comparison of Generative and Discriminative Classifiers

To indicate we have built a strong baseline, we first compare our implementation of the generative and discriminative classifiers to prior work. Note that here we use the whole training set without any truncation on the sequence length.

Table 1 shows that our standard generative and discriminative LSTM models are comparable with [Yogatama et al. \(2017\)](#). All other well-performing models listed in the table are discriminative models that use more complex modeling methods such as attention to boost performance. Since the focus of our paper is the impact of adding latent variables to generative models, we do not use more complex techniques when building our baselines.

Our results show that our standard generative and discriminative LSTM models are comparable with [Yogatama et al. \(2017\)](#). We also see that the generative models have lower classification accuracies with the full training set, which agrees with the findings in the prior work.

## B More Details about Learning with Expectation-Maximization

EM provides a general purpose local search algorithm for learning parameters in probabilistic models with latent variables, and it has been widely used in much prior work and has shown its efficacy in terms of convergence ([Ruder et al., 2018](#); [Neal and Hinton, 1998](#); [Dempster et al., 1977](#)).

[Salakhutdinov et al. \(2003\)](#) theoretically study the close relationship between EM and direct optimization approaches with gradient-based methods. Here we empirically characterize the performance of our auxiliary latent generative classifiers with different training methods, namely EM and stochastic gradient descent (SGD) ([Bottou, 2010](#))

for direct optimization.

For our latent generative classifiers, the Expectation (E) step computes the posterior distributions over the latent variable:

$$\hat{p}(c | x, y) \leftarrow \frac{p(x, y, c)}{\sum_{c' \in \mathcal{C}} p(x, y, c')}$$

The Maximization (M) step seeks to find new parameter estimates by maximizing the following:

$$\sum_{(x,y) \in \mathcal{D}} \sum_{c \in \mathcal{C}} \hat{p}(c | x, y) \log p(x, y, c)$$

## C Alternative Inference Criteria

The classification accuracies of the auxiliary latent generative model in the main text are based on predictions made while marginalizing out the latent variable. In addition, we experiment with two other inference objectives. One uses the posterior  $p(c | x, y)$  instead of the learned prior  $p_{\Phi}(c)$  during marginalization:

$$\hat{y} = \operatorname{argmax}_{y \in \mathcal{Y}} \sum_{c \in \mathcal{C}} p_{\Theta}(x | c, y) p(c | x, y) p_{\Psi}(y)$$

The other way is to predict by maximizing the latent variable:

$$\hat{y} = \operatorname{argmax}_{y \in \mathcal{Y}} \max_{c \in \mathcal{C}} p_{\Theta}(x | c, y) p_{\Phi}(c) p_{\Psi}(y)$$

We find very similar performance with all three inference criteria, which agrees with our observation that the classifiers learn peaked prior and posterior distributions over the discrete latent variables.

## D Additional Results with Training Sizes

While the main paper contained these results in plots, for completeness we provide the numerical classification accuracies of the discriminative (**Disc.**), generative (**Gen.**), and latent-variable generative (**Lat.**) classifiers trained with various training sizes in Tables 2, 3, 4, 5, 6, and 7.

| models                                       | Yelp P | Yelp F | AGNews | Sogou | Yahoo | DBpedia |
|----------------------------------------------|--------|--------|--------|-------|-------|---------|
| generative classifier (ours, shared-LSTM)    | 92.61  | 57.36  | 89.88  | 89.57 | 68.87 | 96.46   |
| discriminative classifier (ours)             | 96.37  | 65.81  | 90.09  | 96.43 | 73.10 | 98.78   |
| gen LSTM-shared (Yogatama et al., 2017)      | 88.20  | 52.70  | 90.60  | 90.30 | 69.30 | 95.40   |
| gen LSTM-independent (Yogatama et al., 2017) | 90.00  | 51.90  | 90.70  | 93.50 | 70.50 | 94.80   |
| disc model (Yogatama et al., 2017)           | 92.60  | 59.60  | 92.10  | 94.90 | 73.70 | 98.70   |
| bag of words (Zhang et al., 2015)            | 92.20  | 58.00  | 88.80  | 92.90 | 68.90 | 96.60   |
| fastText (Joulin et al., 2017)               | 95.70  | 63.90  | 92.50  | 96.80 | 72.30 | 98.60   |
| char-CRNN (Xiao and Cho, 2016)               | 94.50  | 61.80  | 91.40  | 95.20 | 71.70 | 98.60   |
| very deep CNN (Conneau et al., 2017)         | 95.70  | 64.70  | 91.30  | 96.80 | 73.40 | 98.70   |

Table 1: Summary of the results on the full datasets. Our implementation of the generative model share parameters among classes.

| # per class | Disc. | Gen.  | Lat.  |
|-------------|-------|-------|-------|
| 5           | 61.97 | 55.42 | 62.53 |
| 20          | 64.19 | 59.06 | 66.67 |
| 100         | 66.72 | 69.80 | 73.50 |
| 1k          | 77.53 | 78.62 | 81.22 |
| 2k          | 80.48 | 80.98 | 82.96 |
| 5k          | 82.62 | 83.60 | 84.97 |
| 10k         | 85.83 | 85.41 | 85.65 |
| all         | 92.20 | 87.51 | 87.38 |

Table 2: Comparison of classification accuracy on Yelp Review Polarity dataset.

| # per class | Disc. | Gen.  | Lat.  |
|-------------|-------|-------|-------|
| 5           | 23.38 | 21.67 | 27.16 |
| 20          | 25.12 | 26.20 | 31.78 |
| 100         | 29.82 | 35.87 | 38.67 |
| 1k          | 42.85 | 43.36 | 46.05 |
| 2k          | 46.09 | 44.16 | 48.58 |
| 5k          | 52.23 | 47.75 | 49.86 |
| 10k         | 52.23 | 50.30 | 50.19 |
| all         | 59.00 | 52.34 | 51.14 |

Table 3: Comparison of classification accuracy on Yelp Review Full dataset.

| # per class | Disc. | Gen.  | Lat.  |
|-------------|-------|-------|-------|
| 5           | 40.20 | 35.12 | 47.46 |
| 20          | 43.68 | 37.86 | 61.45 |
| 100         | 62.58 | 68.70 | 78.58 |
| 1k          | 78.08 | 84.08 | 86.12 |
| 2k          | 80.80 | 86.70 | 87.25 |
| 5k          | 84.87 | 88.88 | 89.26 |
| 10k         | 87.25 | 89.67 | 89.63 |
| all         | 89.79 | 90.00 | 90.14 |

Table 4: Comparison of classification accuracy on AG News dataset.

| # per class | Disc. | Gen.  | Lat.  |
|-------------|-------|-------|-------|
| 5           | 41.75 | 39.89 | 61.19 |
| 20          | 52.80 | 66.32 | 72.18 |
| 100         | 69.18 | 77.88 | 81.48 |
| 1k          | 83.83 | 84.81 | 86.40 |
| 2k          | 85.04 | 86.50 | 86.61 |
| 5k          | 87.90 | 87.42 | 86.62 |
| 10k         | 89.94 | 87.67 | 86.81 |
| all         | 93.40 | 87.95 | 86.95 |

Table 5: Comparison of classification accuracy on Sogou dataset.

## E Dataset Description

We present our results on six publicly available text classification datasets introduced by Zhang et al. (2015), which include news categorization, sentiment analysis, question/answer topic classification, and article ontology classification. Dataset names and statistics are shown in Table 8. For each dataset, we randomly pick 5000 instances from the training set as the development set.

## F Total Number of Parameters

Table 9 shows the hyperparameter settings for our classifiers. There are various choices of latent variable values and dimensionalities. We select the ones with the best classification accuracy according to the development sets.

Table 10 lists the number of parameters in each

classifier. It is related to the discussion about effect of latent structure in the main paper. We created **Gen. PC** and **Lat. PC** to demonstrate that the performance gains are due to the latent-variable structure instead of an increased number of parameters when adding the latent variables.

## G Results with Larger Models

We increase the model capacity by increasing dimensionality of the word embedding, LSTM hidden embedding, and label embedding to 200 and refer to the resulting models as the large discriminative (**Disc L.**), generative (**Gen L.**), and latent-variable generative (**Lat L.**) classifiers. Note that we did not change the number of values or dimensionality of the latent variables. We only experimented with two datasets due to GPU memory

| # per class | Disc. | Gen.  | Lat.  |
|-------------|-------|-------|-------|
| 5           | 13.26 | 15.39 | 21.00 |
| 20          | 19.98 | 30.33 | 36.55 |
| 100         | 29.97 | 47.33 | 50.04 |
| 1k          | 55.15 | 62.68 | 64.18 |
| 2k          | 60.83 | 65.52 | 65.70 |
| 5k          | 66.07 | 67.95 | 67.79 |
| 10k         | 69.00 | 68.90 | 67.92 |
| all         | 72.70 | 69.14 | 68.02 |

Table 6: Comparison of classification accuracy on Yahoo dataset.

| # per class | Disc. | Gen.  | Lat.  |
|-------------|-------|-------|-------|
| 5           | 32.27 | 63.02 | 66.33 |
| 20          | 43.72 | 82.17 | 85.56 |
| 100         | 74.73 | 90.37 | 92.24 |
| 1k          | 96.11 | 94.62 | 95.54 |
| 2k          | 96.85 | 95.06 | 95.75 |
| 5k          | 97.76 | 95.78 | 96.09 |
| 10k         | 98.15 | 96.29 | 96.30 |
| all         | 98.70 | 96.73 | 96.25 |

Table 7: Comparison of classification accuracy on DBpedia dataset.

limits.<sup>1</sup> Table 11 shows the performance comparison between standard (reported in the main paper) and larger classifiers. We find that the trend **Disc L.** < **Gen L.** < **Lat L.** still holds in most cases in the small-data setting, though the performance gaps shrink as the capacity increases.

## References

- Léon Bottou. 2010. Large-scale machine learning with stochastic gradient descent. In *Proceedings of COMPSTAT'2010*, pages 177–186. Springer.
- Alexis Conneau, Holger Schwenk, Loïc Barrault, and Yann Lecun. 2017. [Very deep convolutional networks for text classification](#). In *Proceedings of the 15th Conference of the European Chapter of the Association for Computational Linguistics: Volume 1, Long Papers*, pages 1107–1116, Valencia, Spain. Association for Computational Linguistics.
- Arthur P. Dempster, Nan M. Laird, and Donald B. Rubin. 1977. Maximum likelihood from incomplete data via the EM algorithm. *Journal of the Royal Statistical Society: Series B (Methodological)*, 39(1):1–22.
- Armand Joulin, Edouard Grave, Piotr Bojanowski, and Tomas Mikolov. 2017. [Bag of tricks for efficient text classification](#). In *Proceedings of the 15th Conference of the European Chapter of the Association*

<sup>1</sup>The GPU memory consumption is affected by the number of labels in the generative and latent generative classifiers. These two datasets have relatively small numbers of labels.

| Dataset       | #Train | #Dev | #Test | #Labels |
|---------------|--------|------|-------|---------|
| Yelp Polarity | 555k   | 5k   | 7.6k  | 2       |
| Yelp Full     | 645k   | 5k   | 50k   | 5       |
| AGNews        | 115k   | 5k   | 7.6k  | 4       |
| Sogou         | 445k   | 5k   | 60k   | 5       |
| Yahoo         | 1395k  | 5k   | 60k   | 10      |
| DBpedia       | 555k   | 5k   | 70k   | 14      |

Table 8: Text classification datasets used in our experiments.

for Computational Linguistics: Volume 2, Short Papers, pages 427–431, Valencia, Spain. Association for Computational Linguistics.

Radford M Neal and Geoffrey E Hinton. 1998. A view of the EM algorithm that justifies incremental, sparse, and other variants. In *Learning in graphical models*, pages 355–368. Springer.

Sebastian Ruder, Ryan Cotterell, Yova Kementchedjhiya, and Anders Søgaard. 2018. A discriminative latent-variable model for bilingual lexicon induction. *arXiv preprint arXiv:1808.09334*.

Ruslan Salakhutdinov, Sam Roweis, and Zoubin Ghahramani. 2003. Relationship between gradient and EM steps in latent variable models.

Yijun Xiao and Kyunghyun Cho. 2016. Efficient character-level document classification by combining convolution and recurrent layers. *arXiv preprint arXiv:1602.00367*.

Dani Yogatama, Chris Dyer, Wang Ling, and Phil Blunsom. 2017. Generative and discriminative text classification with recurrent neural networks. *arXiv preprint arXiv:1703.01898*.

Xiang Zhang, Junbo Zhao, and Yann LeCun. 2015. [Character-level convolutional networks for text classification](#). In *Proceedings of the 28th International Conference on Neural Information Processing Systems - Volume 1, NIPS'15*, pages 649–657, Cambridge, MA, USA. MIT Press.

|                | word embedding | hidden state | label embedding | # latent variable values | latent embedding |
|----------------|----------------|--------------|-----------------|--------------------------|------------------|
| <b>Disc.</b>   | 100            | 100          | 100             | -                        | -                |
| <b>Gen.</b>    | 100            | 100          | 100             | -                        | -                |
| <b>Lat.</b>    | 100            | 100          | 100             | 10, 30, 50               | 10, 50, 100      |
| <b>Gen. PC</b> | 100            | 100          | 110             | -                        | -                |
| <b>Lat. PC</b> | 100            | 100          | 100             | 10                       | 10               |

Table 9: Hyperparameter settings of Discriminative (**Disc.**), Generative (**Gen.**), Latent Generative (**Lat.**), Generative PC (**Gen. PC**), Latent Generative PC (**Lat. PC**) classifiers. **PC** stands for “Parameter-comparison Configuration.” More description can be found in the main paper.

| Dataset | # per class | Disc.     | Gen.       | Lat.       | Gen. PC    | Lat. PC    |
|---------|-------------|-----------|------------|------------|------------|------------|
| Yelp P  | 5           | 4,082,414 | 12,642,828 | 16,122,903 | 12,481,640 | 12,521,733 |
|         | 20          |           |            | 14,123,253 |            |            |
|         | 100         |           |            | 14,123,253 |            |            |
|         | 1k          |           |            | 14,123,253 |            |            |
|         | all         |           |            | 16,122,903 |            |            |
| Yelp F  | 5           | 4,082,414 | 12,642,828 | 12,522,233 | 12,481,640 | 12,521,733 |
|         | 20          |           |            | 12,522,233 |            |            |
|         | 100         |           |            | 12,522,233 |            |            |
|         | 1k          |           |            | 12,522,233 |            |            |
|         | all         |           |            | 14,122,553 |            |            |
| AGNews  | 5           | 4,082,414 | 12,642,828 | 11,430,985 | 10,104,780 | 10,137,185 |
|         | 20          |           |            | 10,137,185 |            |            |
|         | 100         |           |            | 11,430,985 |            |            |
|         | 1k          |           |            | 10,137,585 |            |            |
|         | all         |           |            | 12,522,333 |            |            |
| Sogou   | 5           | 4,082,414 | 12,642,828 | 13,162,568 | 11,634,120 | 11,671,448 |
|         | 20          |           |            | 13,163,568 |            |            |
|         | 100         |           |            | 15,028,468 |            |            |
|         | 1k          |           |            | 11,676,935 |            |            |
|         | all         |           |            | 12,522,233 |            |            |
| Yahoo   | 5           | 4,082,414 | 12,642,828 | 12,522,533 | 12,482,520 | 12,522,533 |
|         | 20          |           |            | 14,124,053 |            |            |
|         | 100         |           |            | 12,522,733 |            |            |
|         | 1k          |           |            | 12,522,533 |            |            |
|         | all         |           |            | 16,123,703 |            |            |
| DBpedia | 5           | 4,082,414 | 12,642,828 | 12,522,933 | 12,482,960 | 12,522,933 |
|         | 20          |           |            | 14,124,453 |            |            |
|         | 100         |           |            | 14,124,453 |            |            |
|         | 1k          |           |            | 16,126,103 |            |            |
|         | all         |           |            | 12,522,933 |            |            |

Table 10: Number of parameters in each classifier.

|               | # per class | Disc L. | Gen L. | Lat L. | Disc. | Gen.  | Lat.  |
|---------------|-------------|---------|--------|--------|-------|-------|-------|
| AGNews        | 5           | 37.34   | 40.55  | 47.91  | 40.20 | 35.12 | 47.46 |
|               | 20          | 44.53   | 47.42  | 62.36  | 43.68 | 37.86 | 61.45 |
|               | 100         | 62.74   | 76.95  | 79.63  | 62.58 | 68.70 | 78.58 |
|               | 1k          | 80.67   | 84.82  | 86.79  | 78.08 | 84.08 | 86.12 |
|               | all         | 90.54   | 90.16  | 89.68  | 89.79 | 90.00 | 90.14 |
| Yelp Polarity | 5           | 60.82   | 60.65  | 63.07  | 61.97 | 55.42 | 62.53 |
|               | 20          | 61.11   | 64.44  | 67.50  | 64.19 | 59.06 | 66.67 |
|               | 100         | 68.55   | 71.79  | 74.37  | 66.72 | 69.80 | 73.50 |
|               | 1k          | 77.93   | 78.91  | 81.82  | 77.53 | 78.62 | 81.22 |
|               | all         | 92.48   | 87.76  | 87.34  | 92.20 | 87.51 | 87.38 |

Table 11: Comparison of classification accuracies between standard and larger classifiers.
